# Supplementary material for: Creation and implementation of SAMPRO™: A school-based asthma management program
Source: PubMed Central journal article supplement — J Allergy Clin Immunol. Author manuscript; Available in PMC 2016 Oct 28. (PMC5085063; doi:10.1016/j.jaci.2016.06.015), 2016-09
Supplement: NIHMS822048-supplement-a.pdf [file NIHMS822048-supplement-a.pdf]

Name: \_\_\_\_\_

Birthdate: \_\_\_\_\_

**Asthma Severity:** **A**  Intermittent  Mild Persistent  Moderate Persistent  Severe Persistent  
 He/she has had many or severe asthma attacks/exacerbations

**B**

**Green Zone** ☺ Have the child take these medicines every day, even when the child feels well.

Always use a spacer with inhalers as directed.

Controller Medicine(s): \_\_\_\_\_

Controller Medicine(s) Given in School: \_\_\_\_\_ **D**

Rescue Medicine: Albuterol/Levalbuterol \_\_\_\_\_ puffs every four hours as needed

Exercise Medicine: Albuterol/Levalbuterol \_\_\_\_\_ puffs 15 minutes before activity as needed

**C**

**Yellow Zone** ☹ Begin the sick treatment plan if the child has a cough, wheeze, shortness of breath, or tight chest. Have the child take all of these medicines when sick.

Rescue Medicine: Albuterol/Levalbuterol \_\_\_\_\_ **E** puffs every 4 hours as needed

Controller Medicine(s): \_\_\_\_\_

Continue Green Zone medicines: \_\_\_\_\_

Add: \_\_\_\_\_

Change: \_\_\_\_\_

If the child is in the **yellow** zone more than **24** hours or is getting worse, follow **red** zone and call the doctor right away!

**Red Zone** ☹ If breathing is hard and fast, ribs sticking out, trouble walking, talking, or sleeping.  
**Get Help Now**

**Take rescue medicine(s) now**

Rescue Medicine: Albuterol/Levalbuterol \_\_\_\_\_ puffs every \_\_\_\_\_ **F**

Take: \_\_\_\_\_

**If the child is not better right away, call 911**  
Please call the doctor any time the child is in the red zone.

**Asthma Triggers:** (List) **G**

**School Staff:** Follow the Yellow and Red Zone plans for rescue medicines according to asthma symptoms. Unless otherwise noted, the only controllers to be administered in school are those listed as "given in school" in the green zone.

Both the asthma provider and the parent feel that the child may carry and self-administer their inhalers **H**  
 School nurse agrees with student self-administering the inhalers

Asthma Provider Printed Name and Contact Information: \_\_\_\_\_

**I**

Asthma Provider Signature: \_\_\_\_\_

Date: \_\_\_\_\_

**Parent/Guardian:** I give written authorization for the medications listed in the action plan to be administered in school by the nurse or other school members as appropriate. I consent to communication between the prescribing health care provider/clinic, the school nurse, the school medical advisor and school-based health clinic providers necessary for asthma management and administration of this medication.

Parent/guardian signature: \_\_\_\_\_ **J**

Date: \_\_\_\_\_

School Nurse Reviewed: \_\_\_\_\_

Date: \_\_\_\_\_ **K**

Please send a signed copy back to the provider listed above.
